# Supplementary material for: mHealth: providing a mindfulness app for women with chronic pelvic pain in gynaecology outpatient clinics: qualitative data analysis of user experience and lessons learnt
Source: PubMed Central journal article supplement (PMC7069307; doi:10.1136/bmjopen-2019-030711), 2020-03-12
Supplement: bmjopen-2019-030711supp001.pdf [file bmjopen-2019-030711supp001.pdf]

## APPENDIX 1

| <b>Feature</b>                      | <b>Positive aspects</b>                                                           | <b>Negative aspects</b>                                                                                                                                                                                                                                                                                                                                                                | <b>Solutions</b>                                                                                                                                   |
|-------------------------------------|-----------------------------------------------------------------------------------|----------------------------------------------------------------------------------------------------------------------------------------------------------------------------------------------------------------------------------------------------------------------------------------------------------------------------------------------------------------------------------------|----------------------------------------------------------------------------------------------------------------------------------------------------|
| <b>Voice</b>                        | Liked by some participants, considered soothing and even spiritual                | The voice was not relaxing. One had to listen carefully which meant you could not switch off; otherwise you could not hear instruction clearly during meditation.<br><br>It was also too repetitive, after 10 times it felt like a chore and not something to look forward to.                                                                                                         | Choice of different voices<br><br>participants should be told it takes time to get into the rhythm of the instructions, but you can get used to it |
| <b>General interface aesthetics</b> | colours really fresh, interface not too busy, with pleasing layout and aesthetics | one participant would prefer different, bright, colours such as purple                                                                                                                                                                                                                                                                                                                 | None needed                                                                                                                                        |
| <b>Graphics</b>                     |                                                                                   | The pictures were often not appropriate as they focused on the problem (e.g. tooth pain logo) rather than something positive or soothing. Unanticipated problems could arise according to one participant; she found it hard to lose weight and felt the food icons a) did not represent success and b) reminded her of eating.<br><br>One participant found the pictures hard to see. | Psychological theory supports the view that positive images would be advisable                                                                     |

|                     |                                                                                                                                                                                                                                       |                                                                                                                                                                                                                                                          |                                                                                                                                                                                                                                                                                                             |
|---------------------|---------------------------------------------------------------------------------------------------------------------------------------------------------------------------------------------------------------------------------------|----------------------------------------------------------------------------------------------------------------------------------------------------------------------------------------------------------------------------------------------------------|-------------------------------------------------------------------------------------------------------------------------------------------------------------------------------------------------------------------------------------------------------------------------------------------------------------|
|                     |                                                                                                                                                                                                                                       |                                                                                                                                                                                                                                                          |                                                                                                                                                                                                                                                                                                             |
| <b>Animations</b>   | liked                                                                                                                                                                                                                                 | poorly chosen                                                                                                                                                                                                                                            | None needed                                                                                                                                                                                                                                                                                                 |
| <b>Progress</b>     | <p>One participant liked the way the app helped progress through the stages.</p> <p>Another participant, with cyclical pain and hence cyclical use, did not aim to progress but simply chose to use the baseline video each time.</p> | <p>Three participants were frustrated and even 'angry' and 'patronised' at having to do the same (basic) meditation several times before moving up a stage.</p> <p>There was no indication of goals, duration of each level or gamification rewards.</p> | <p>Goal setting is recommended by psychological theory and could be as simple as using "day 1 of 30" rather than simply Day 1.</p> <p>Changing emojis could show progress, for example from a sad face to a smiley face to a heart; the inbuilt progress function was not felt sufficiently motivating.</p> |
| <b>Introduction</b> |                                                                                                                                                                                                                                       | Experienced app users suggested the introduction could be improved for initiates                                                                                                                                                                         | <p>overview of the entire app and its levels suggested for the start.</p> <p>One participant had done mindfulness before but thought an introduction to mindfulness might be helpful for others.</p>                                                                                                        |
| <b>Enjoyment</b>    | considered fun by some participants.                                                                                                                                                                                                  | One said it was not very 'interesting'.                                                                                                                                                                                                                  | <p>Include examples of a patient's day with the app to cater for a greater variety of participants</p> <p>It would be good to have other features as drop down options that were fun and</p>                                                                                                                |

|                          |  |                                                                               |                                                                                                                                                                                                                                                                                         |
|--------------------------|--|-------------------------------------------------------------------------------|-----------------------------------------------------------------------------------------------------------------------------------------------------------------------------------------------------------------------------------------------------------------------------------------|
|                          |  |                                                                               | did not involve meditation.                                                                                                                                                                                                                                                             |
| <b>Session intensity</b> |  | Would be good to choose the duration of the meditation.                       | 15 or 20 mins would be better than 10, which is not enough time shut off and meditate deeply.<br><br>The option to control this was important as even 10 minutes was a difficult commitment for some busy participants (1074, 1075, 1078) or those battling with chronic fatigue (1074) |
| <b>Pain modules</b>      |  | it can be hard to focus on something like using the app when you are in pain. | None needed                                                                                                                                                                                                                                                                             |

**Comments on app acceptability and usability made by n=13 patients. Two patients walked through the app with the researcher**
